## ERRATUM

### Preoperative Evaluation Clinic Visit Is Associated with Decreased Risk of In-hospital Postoperative Mortality: Erratum

In the August 2016 issue, the article beginning on page 280 included errors in the tallies in the column headings and in the row categories of table 4. The numbers within the table body below the column headings are and were correct. There were no errors in the actual numbers reported or analyzed, but rather an error with the way the columns and rows were totaled. The corrected table is included below, with the corrected numbers in red.

**Table 4.** Number of Deaths Attributed to Failure to Rescue in Each Cohort Post Propensity Score Matching

|                                | Seen in<br>PEC (n = 11) | Not Seen in<br>PEC (n = 23) |
|--------------------------------|-------------------------|-----------------------------|
| Failure to rescue (n = 17)     | 8 (73)                  | 9 (39)                      |
| Non failure to rescue (n = 17) | 3 (27)                  | 14 (61)                     |

All categories are represented as n (%).  $P = 0.141$ .

PEC = preoperative evaluation clinic.

#### Reference

Blitz JD, Kendale SM, Jain SK, Cuff GE, Kim JT, Rosenberg AD: Preoperative evaluation clinic visit is associated with decreased risk of in-hospital postoperative mortality. *ANESTHESIOLOGY* 2016; 125:280–94

## ERRATUM

### Effects of Volatile Anesthetics on Mortality and Postoperative Pulmonary and Other Complications in Patients Undergoing Surgery: A Systematic Review and Meta-analysis: Erratum

In the June 2016 issue, the article beginning on page 1230 included errors in the number of patients corresponding to the respective circles in figure 2A. The circle sizes, however, were correct. The corrected figure is included below. We thank the unknown reader who called our attention to this error.

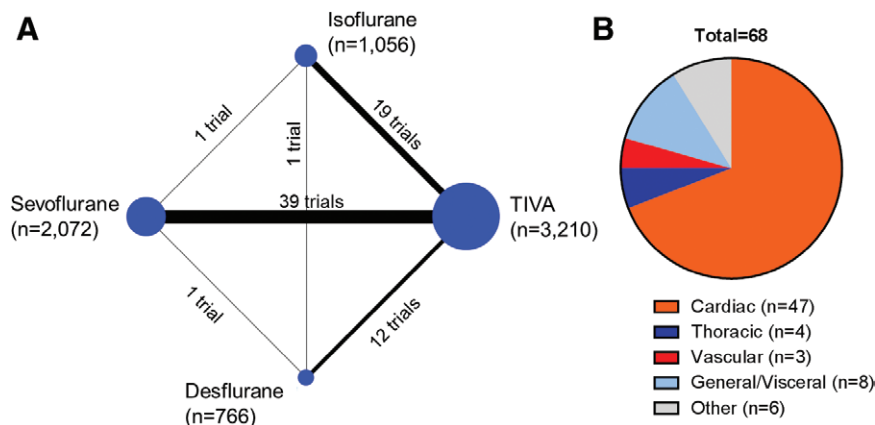

#### Reference

Uhlir C, Bluth T, Schwarz K, Deckert S, Heinrich L, De Hert S, Landoni G, Serpa Neto A, Schultz MJ, Pelosi P, Schmitt J, Gama de Abreu M: Effects of volatile anesthetics on mortality and postoperative pulmonary and other complications in patients undergoing surgery: A systematic review and meta-analysis. *ANESTHESIOLOGY* 2016; 124:1230–45
